# Supplementary material for: Blond and blood juice supplementation in high fat diet fed mice: effect on antioxidant status and DDAH/ADMA pathway
Source: Royal Society of Chemistry journal article supplement (doi:10.1039/c9ra00669a), 2019-01-01
Supplement: c9ra00669a1.pdf [file c9ra00669a1.pdf]

## SUPPLEMENTARY INFORMATION

### Diet Composition

#### *Standard diet (SD)*

2018S Teklad Global 18% Protein Rodent Diet (Sterilizable) is designed and manufactured with high quality ingredients., 2018S is a fixed formula diet containing a minimum of 18% protein and 5%fat. Promotes gestation, lactation, and consistent growth of rodents. Absence of animal protein and fish meal eliminates the presence of nitrosamines. Does not contain alfalfa, thus lowering the occurrence of natural phytoestrogens. 2018S is a balanced diet supplemented with additional vitamins to ensure nutritional adequacy after autoclaving. Diet 2018S is available certified (2018SC).

Ingredients—Ground wheat, ground corn, wheat middlings, dehulled soybean meal, corn gluten meal, soybean oil, calcium carbonate, brewers dried yeast,dicalcium phosphate, iodized salt, L-lysine, DL-methionine, choline chloride,thiamine mononitrate, biotin, niacin, vitamin A acetate, pyridoxine hydrochloride,vitamin D3 supplement, folic acid, menadione sodium bisulfite complex(source of vitamin K activity), calcium pantothenate, vitamin E supplement, vitamin B12 supplement, riboflavin, ferrous sulfate, magnesium oxide, manganous oxide, zinc oxide, copper sulfate, calcium iodate, cobalt carbonate, chromium potassium sulfate, kaolin.

*Macronutrients:* Crude Protein % 18.8 Crude Oil (Fat) % 6.0 Crude Fiber % 3.8 Ash % 5.9 Carbohydrate (available) % 50.0 Starch % 45.0 Sugar % 5.0

*Minerals:* Calcium % 1.0 Phosphorus % 0.65 Sodium % 0.23 Potassium % 0.68 Chloride % 0.40 Magnesium % 0.20 Zinc mg/kg 77.0 Manganese mg/kg 118.0 Copper mg/kg 15.0 Iodine (added) mg/kg 12.0 Iron mg/kg 225.0 Selenium ug/kg 200 Cobalt ug/kg 600 Chromium ug/kg 500

*Amino Acids:* Aspartic Acid % 1.42 Glutamic Acid % 3.70 Alanine % 1.08 Glycine % 0.79 Threonine % 0.67 Proline % 1.55 Serine % 0.97 Leucine % 1.94 Isoleucine % 0.85 Valine % 0.95 Phenylalanine % 0.99 Tyrosine % 0.61 Phe + Tyr % 1.60 Methionine % 0.43 Cystine % 0.33 Met + Cyst % 0.76 Lysine % 1.03 Histidine % 0.47 Arginine % 1.06 Tryptophan % 0.20 Available Lysine % 0.83

*Vitamins:* Vitamin A iu/g 30.7 Retinol mg/kg 9.3 Vitamin D3 iu/g 2.1 Cholecalciferol ug/kg 51 Vitamin E (a-tocopherol) mg/kg 128.0 Vitamin K3 (menadione) mg/kg 102.0 Vitamin B1 (thiamine) mg/kg 117.6 Vitamin B2 (riboflavin) mg/kg 27.2 Avail. Niacin (nicotinic acid) mg/kg 87.3 Vitamin B6 (pyridoxine) mg/kg 26.8 Pantothenic Acid mg/kg 141.6 Vitamin B12 (cyanocobalamin) ug/kg 150 Avail. Biotin mg/kg 0.8 Folate mg/kg 8.4 Vitamin C mg/kg — Choline mg/kg 1120.0 B Carotene mg/kg 2.5 Inositol mg/kg 1450.0

*Fatty Acids:* C16:0 Palmitic g/kg 7.6 C18:0 Stearic g/kg 1.5 C18:1 $\omega$ 9 Oleic g/kg 12.6 C18:2 $\omega$ 6 Linoleic g/kg 31.3 C18:3 $\omega$ 3 Linolenic g/kg 2.8 Total Saturated g/kg 9.6 Total Monounsaturated g/kg 12.8 Total Polyunsaturated g/kg 34.1 Cholesterol mg/kg 0.

#### *High fat diet (HFD)*

Harlan Teklad Custom Research Diets TD.97070 High Fat Diet is a diet used to induce obesity. Approximate fatty acid profile (% of total fat): 45% saturated, 24% trans, 24% monounsaturated (cis), 7% polyunsaturate(cis). This diet has a paste-like consistency and can be chilled and cut into cubes for conventional feeding. Dispensed diet should be replaced frequently. Cited in JEM (2005) 202:517-527.

#### Ingredient (g/Kg):

Casein 270.0  
DL-Methionine 4.0  
Sucrose 165.2  
Corn Starch 100.0  
Vegetable Shortening, hydrogenated (Primex) 245.1  
Coconut Oil 90.0  
Cellulose 57.74  
Mineral Mix, AIN-93G-MX (94046) 47.0  
Calcium Phosphate, dibasic 5.4  
Vitamin Mix, Teklad (40060) 13.0  
Choline Bitartrate 2.5  
Ethoxyquin, antioxidant 0.06
